# Supplementary material
Source: HighWire-hosted journal article supplement (https://innovations.bmj.com/highwire/filestream/139216/field_highwire_adjunct_files/0/bmjinnov-2021-000885supp001_data_supplement.pdf)
Supplement: bmjinnov-2021-000885supp001_data_supplement.pdf [file bmjinnov-2021-000885supp001_data_supplement.pdf]

**Tell us about a time you worked with young people or conducted some research.**

---

---

---

---

---

---

---

---

**Why do you want to be part of the YRA?**

---

---

---

---

---

---

---

---

**Tell us why we should pick you to be a part of the YRA.**

---

---

---

---

---

---

---

---

**Describe a time when you had to work with others.**

---

---

---

---

---

---

---

---

---

---

*Submission deadline is **22nd January 2021**. Candidates selected for the YRA will be informed in February 2021. Applications can be dropped off at one of the following addresses:*

|                                                   |                                                                    |
|---------------------------------------------------|--------------------------------------------------------------------|
| BRTI                                              | 11 Routledge street, Milton Park, Harare                           |
| BRTI                                              | 10 Seagrave, Avondale, Harare                                      |
| SAYWHAT International                             | 4 Jefferson, Logan Park, Hatfield Harare                           |
| Youth Advocates Zimbabwe (YAZ)                    | 2595 Unit B Seke Chitungwiza Zimbabwe                              |
| Danhiko Project                                   | 123 Mutare Road. P O Box AY 179. Amby Msasa.                       |
| GAYS and Lesbian Association of Zimbabwe (GALZ)   | 35, Colenbrander Rd, Harare, Zimbabwe                              |
| Zimbabwe Young Positives                          | 28 Divine Road Milton Park                                         |
| Budiriro                                          | Budiriro 1 Community Centre (only on Thursday)                     |
| Tafara                                            | Tafara Community Centre 2 (only on Tuesday)                        |
| Warren Park                                       | Magamba Hall (only on Wednesday)                                   |
| Warren Park                                       | Warren Park Community centre (only on Wednesday)                   |
| Hatcliffe                                         | Hatcliffe Community Centre (only on Monday)                        |
| Hopley                                            | Tariro Youth-Friendly Centre (only on Monday)                      |
| Chitungwiza                                       | Chitungwiza Community Hall (only on Tuesday)                       |
| Africaid Zvandiri                                 | 11-12 Stoneridge Way North, Avondale                               |
| Youth Empowerment and Transformation Trust (YETT) | 7 Capri Road, Highlands, Harare                                    |
| CeSHHAR                                           | 4 Bath Road, Belgravia, Harare                                     |
| Restless Development                              | Agriculture house<br>1 Adylinn Road, Marlborough, Room 116, Harare |
| PZAT                                              | 27 Rowland Square, Milton Park                                     |
| Katswe Sisterhood                                 | 22 Suffolk Road, Strathaven                                        |
| IGNITE Youth                                      | Avondale, Harare (info@igniteyouth.co.zw)                          |
| ZICHIRE                                           | 59 Van Praagh Ave, Milton Park, Harare                             |
| Childline                                         | 31 Frankson Ave, Eastlea, Harare                                   |
| Young People's Program Zimbabwe                   | 66 Jason Moyo Ave, Harare                                          |

#### CONTACT US

Mufaro Makuni  
mufaronashe@gmail.com  
+263 774 153 146

Mandi Tembo  
mandikudza.tembo@lshtm.ac.uk  
+263 772 676 417
